# Supplementary material
Source: MDPI journal article supplement (https://www.mdpi.com/2073-4344/9/1/54)
Supplement: s1 [file s1]

Electronic Supplementary Information

**Enzymatic Synthesis of  $\omega$ -hydroxydodecanoic acid employing a  
Cytochrome P450 from *Limnobacter* sp. 105 MED**

Sung-yeon ju<sup>1,2\*</sup>

Hee-Wang Yoo<sup>1,2\*</sup>

Sharad Sarak<sup>1</sup>

Byung-Gee Kim<sup>2</sup>

Hyungdon Yun<sup>1</sup>

<sup>1</sup>Department of Systems Biotechnology, Konkuk University, Seoul, South Korea

<sup>2</sup>School of Chemical and Biological Engineering, Seoul National University, Seoul,  
South Korea

\*These authors contributed equally

**Correspondence:** Prof. Yun Hyungdon, Department of Systems Biotechnology,  
Konkuk University, 120 Neungdong-ro, Gwangjin-gu, Seoul-050-29, South Korea

**E-mail:** [hyungdon@konkuk.ac.kr](mailto:hyungdon@konkuk.ac.kr)

**Table S1****Plasmids and strains used in this study**

| Plasmids/Strains         | Description                                  | Reference      |
|--------------------------|----------------------------------------------|----------------|
| <b>Plasmids</b>          |                                              |                |
| pET24ma                  | P15A ori lacI T7 promoter, KmR               | [1]            |
| pETDuet-1                | pBR322 ori lacI T7 promoter, AmpR            | <i>Novagen</i> |
| pCDFDuet-1 CDF           | CDF ori lacI T7 promoter, SmR                | <i>Novagen</i> |
| pCamAB                   | pETDuet-1 encoding CamA/B                    | [2]            |
| pRedox <sub>L,m</sub>    | pETDuet-1 encoding LimA/B                    | This study     |
| pAM.aq                   | pCDFDuet-1 CDF encoding fadL and CYP153AM.aq | This study     |
| pAA.d                    | pCDFDuet-1 CDF encoding fadL and CYP153AA.d  | This study     |
| pAS.f                    | pCDFDuet-1 CDF encoding fadL and CYP153AS.f  | This study     |
| pAL.m                    | pCDFDuet-1 CDF encoding fadL and CYP153AL.m  | This study     |
| pCYP153A <sub>M,aq</sub> | pET28a encoding CYP153A <sub>M,aq</sub>      | [1]            |
| pCamA                    | pET28a encoding CamA                         | [1]            |
| pCamB                    | pET28a encoding CamB                         | [1]            |
| pCYP153A <sub>L,m</sub>  | pET24ma encoding CYP153A <sub>L,m</sub>      | This study     |
| pLimA                    | pet24ma encoding LimA                        | This study     |
| pLimB                    | pet24ma encoding LimB                        | This study     |

| <b>Strains</b> |                                                                       |            |
|----------------|-----------------------------------------------------------------------|------------|
| BW25113(DE3)   | rrnB3 ΔlacZ4787 hsdR514 Δ(araBAD)567 Δ(rhaBAD)568 [2]<br>rph-1 λ(DE3) |            |
| DL             | BW25113(DE3) ΔfadD                                                    | [2]        |
| MC             | DL carrying pAM.aq and pCamAB                                         | This study |
| DC             | DL carrying pAA.d and pCamAB                                          | This study |
| SC             | DL carrying pAS.f and pCamAB                                          | This study |
| LC             | DL carrying pCYP153AL.m and pCamAB                                    | This study |
| LL             | DL carrying pCYP153AL.m and pRedox <sub>L.m</sub>                     | This study |
| DLM            | DL carrying pCYP153 M.aq                                              | This study |
| DLCA           | DL carrying pCamA                                                     | This study |
| DLCB           | DL carrying pCamB                                                     | This study |
| DLL            | DL carrying pCYP153L.m                                                | This study |
| DLLA           | DL carrying pLimA                                                     | This study |
| DLLB           | DL carrying pLimB                                                     | This study |

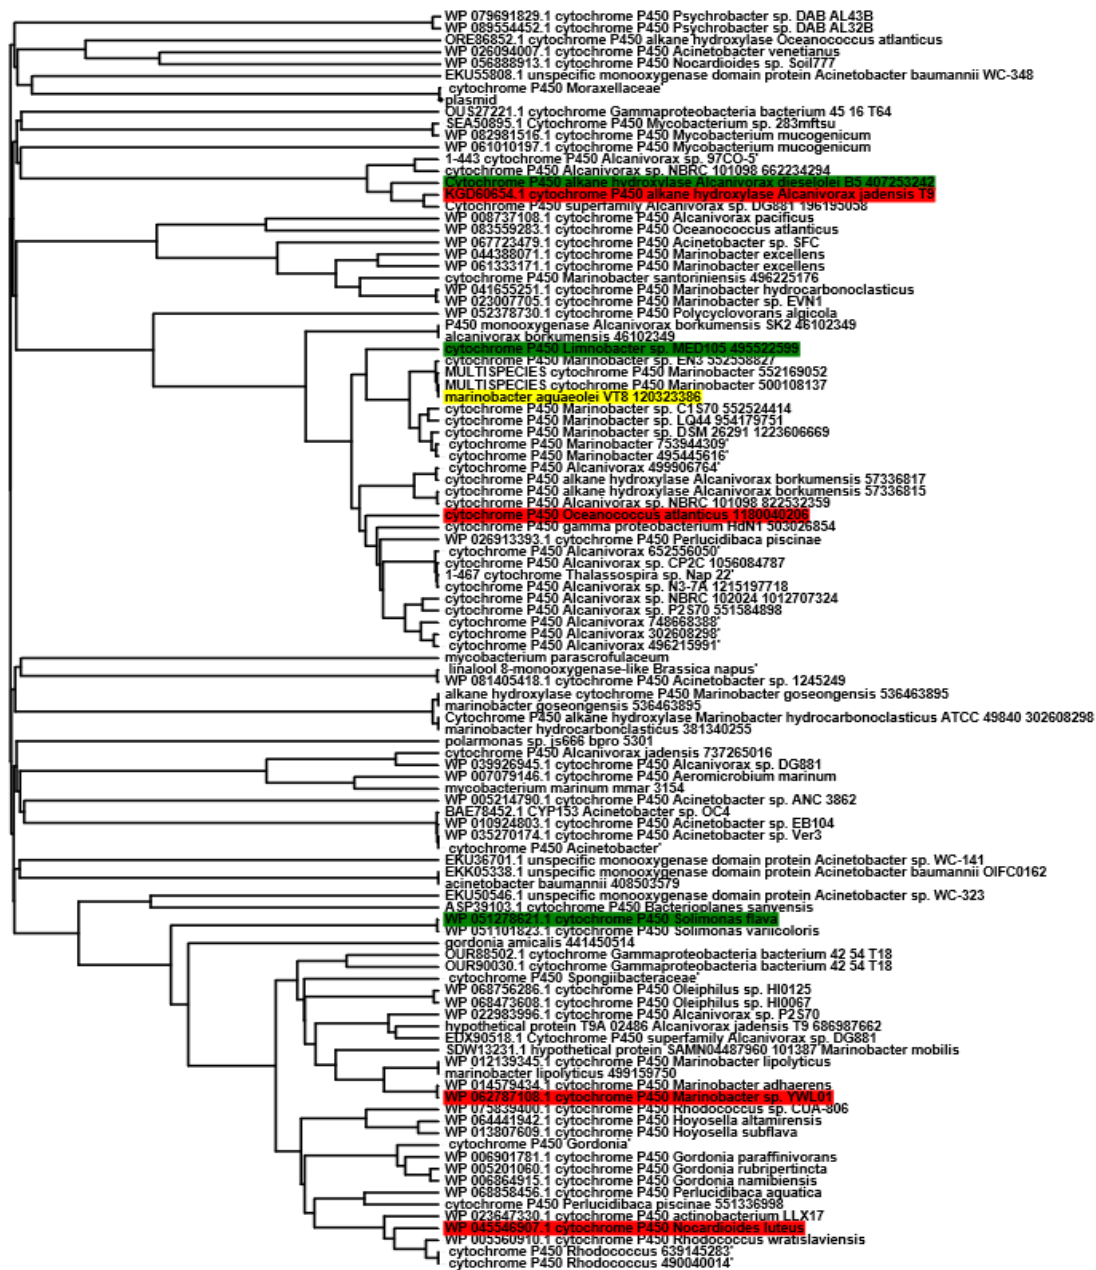

**Figure S1. Phylogenetic tree used in this study**

The phylogenetic tree was constructed through Maximum like hood tree algorithm in

software MEGA7. Initially, 100 candidates were obtained by Blastp

[<http://blast.ncbi.nlm.nih.gov> ], using maqu\_0600 sequence. Yellow color: CYP153AM.aq,

green color: expressed P450s and Red color: not expressed P450.



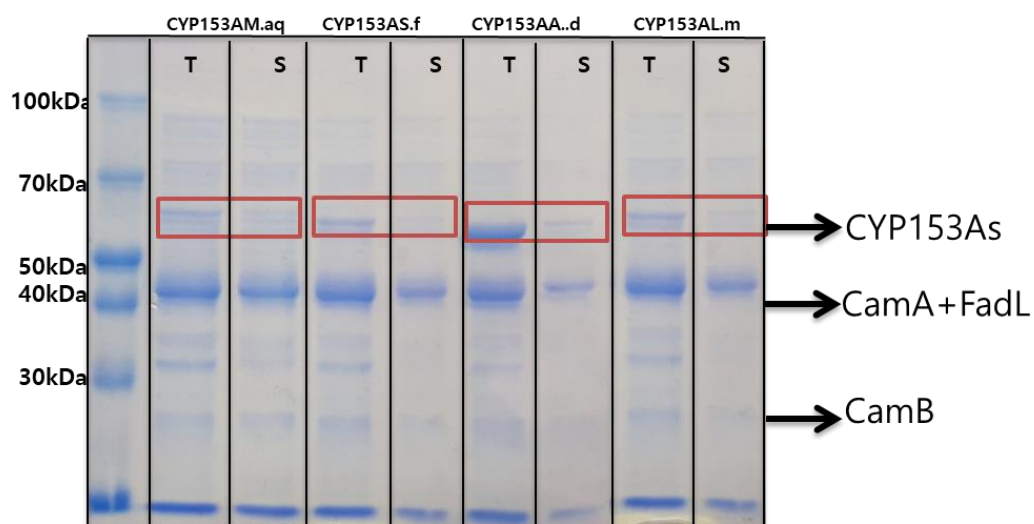

**Figure S2. A SDS-PAGE analysis of protein expression of CYP153As**

*E. coli* BW25113 ( $\Delta fadD$ , DE3) was used, Protein expression was carried out using 0.01 mM IPTG, 0.5 mM 5-ALA and trace mineral mixtures (2.5 mL/L) at 30 °C temp. CamB (12.75 kDa), CamA (47 kDa), FadL( 48.8kDa), CYP153As (52.28 kDa)

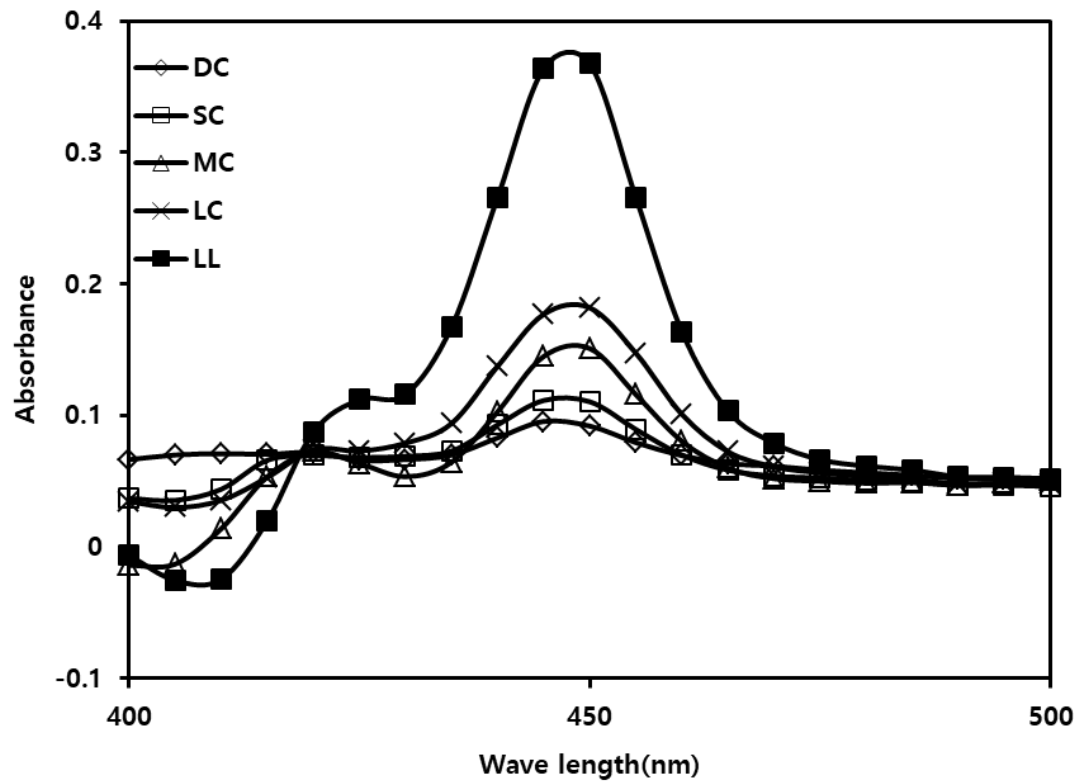

**Figure S3. A CO-binding analysis of CYP153A expressing strains used in this study**

MC= *E. coli* BW25113 ( $\Delta$ *fadD*, DE3) having CYP153AM.aq+CamA+CamB+FadL

DC= *E. coli* BW25113 ( $\Delta$ *fadD*, DE3) having CYP153AA.d+CamA+CamB+FadL

SC= *E. coli* BW25113 ( $\Delta$ *fadD*, DE3) having CYP153AS.f +CamA+CamB+FadL

LC= *E. coli* BW25113 ( $\Delta$ *fadD*, DE3) having CYP153AL.m+ CamA+CamB+FadL

LL= *E. coli* BW25113 ( $\Delta$ *fadD*, DE3) having CYP153AL.m+LimA+LimB+FadL

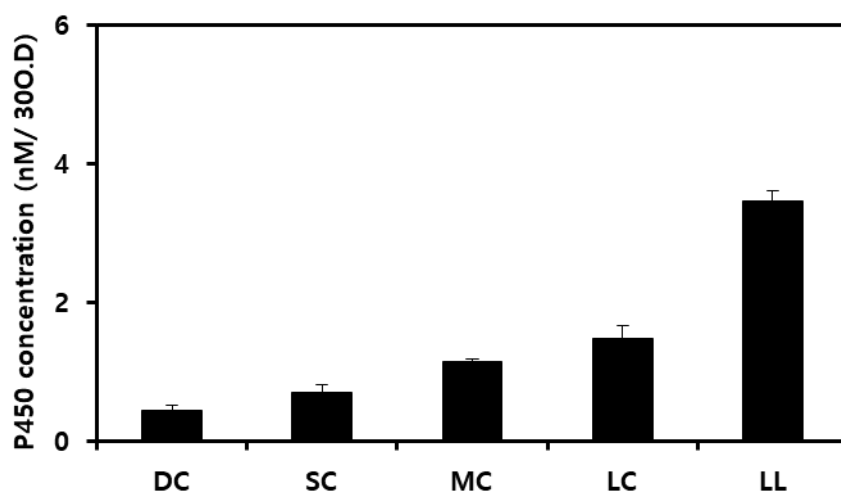

**Figure S4. An active P450 concentration used in this study.**

The concentration of P450 was measured using an extinction coefficient of  $91.9 \text{ mM}^{-1} \text{ cm}^{-1}$  at 450 nm.

MC= *E. coli* BW25113 ( $\Delta fadD$ , DE3) having CYP153AM.aq+CamA+CamB+FadL

DC= *E. coli* BW25113 ( $\Delta fadD$ , DE3) having CYP153AA.d+CamA+CamB+FadL

SC= *E. coli* BW25113 ( $\Delta fadD$ , DE3) having CYP153AS.f +CamA+CamB+FadL

LC= *E. coli* BW25113 ( $\Delta fadD$ , DE3) having CYP153AL.m+ CamA+CamB+FadL

LL= *E. coli* BW25113 ( $\Delta fadD$ , DE3) having CYP153AL.m+LimA+LimB+FadL



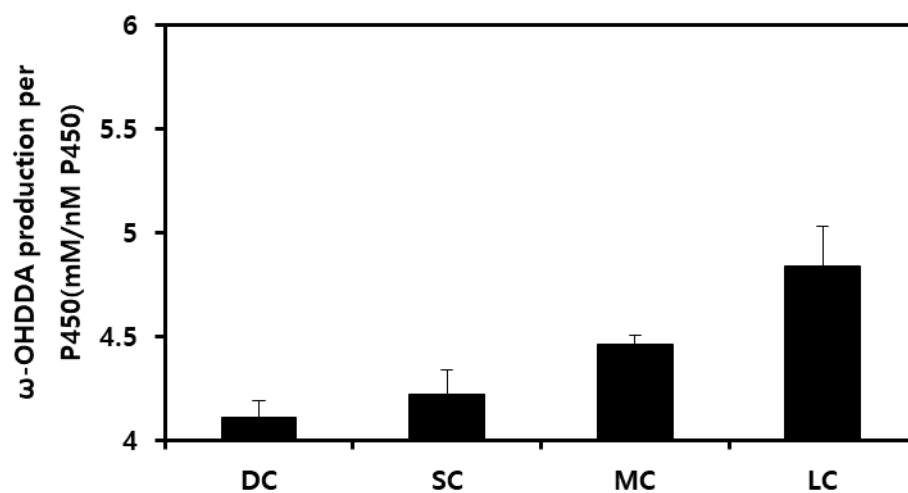

**Figure S5.  $\omega$ -OHDDA production normalized by amount of active P450s.**

(The final titer in Figure.2 was normalized by the amount of active P450s in Figure S3)

MC= *E. coli* BW25113 ( $\Delta fadD$ , DE3) having CYP153AM.aq+CamA+CamB+FadL

DC= *E. coli* BW25113 ( $\Delta fadD$ , DE3) having CYP153AA.d+CamA+CamB+FadL

SC= *E. coli* BW25113 ( $\Delta fadD$ , DE3) having CYP153AS.f +CamA+CamB+FadL

LC= *E. coli* BW25113 ( $\Delta fadD$ , DE3) having CYP153AL.m+ CamA+CamB+FadL

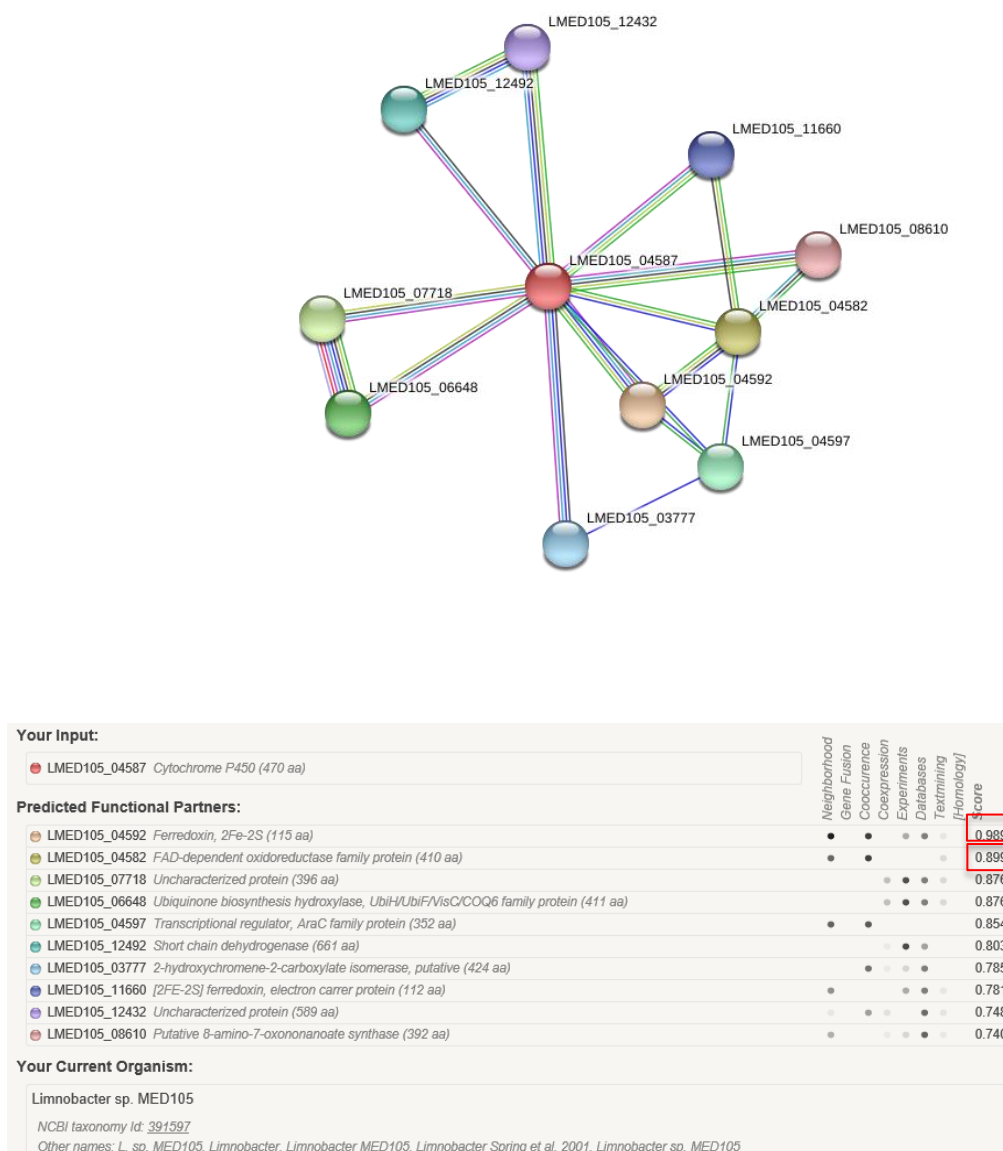

**Figure S6. Protein-protein network of CYP153AL.m(LMED105\_04587).**

There are two 2Fe-2S ferredoxin in the network (LMED105\_04592, LMED105\_11660) having score 0.989 and 0.781 respectively. LMED105\_04592(LimB) was used in this study as it has higher score than LMED105\_11660 also LMED105\_04582(LimA) was used as its corresponding reductase.

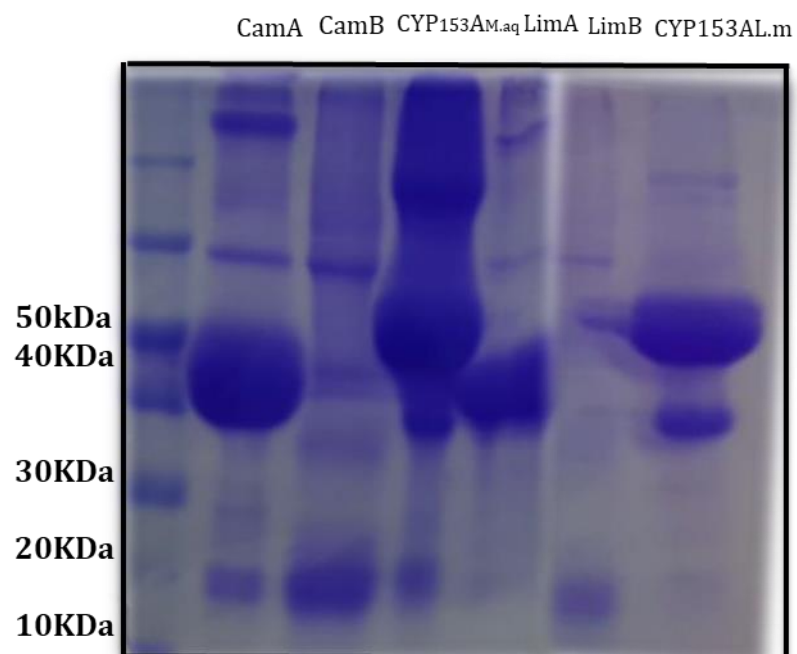

**Figure S7. SDS-PAGE gel picture of purified protein of CamB (12.75 kDa), CamA (47 kDa), CYP153AM.aq (52.28 kDa) ,LimB (11.87 kDa), LimA (45.61 kDa), and CYP153AL.m (52.28 kDa).**

## Reference.

- [1] Jung, E., Park, B. G., Ahsan, M. M., Kim, J., et al., Production of  $\omega$ -hydroxy palmitic acid using CYP153A35 and comparison of cytochrome P450 electron transfer system in vivo. *Applied microbiology and biotechnology* 2016, 100, 10375-10384.
- [2] Bae, J. H., Park, B. G., Jung, E., Lee, P.-G., Kim, B.-G., fadD deletion and fadL overexpression in *Escherichia coli* increase hydroxy long-chain fatty acid productivity. *Applied microbiology and biotechnology* 2014, 98, 8917-8925.
- [3] Szklarczyk, D., Morris, J. H., Cook, H., Kuhn, M., *et al.*, The STRING database in 2017: quality-controlled protein-protein association networks, made broadly accessible. *Nucleic acids research* 2017, 45, D362-D368.
